# Supplementary material
Source: PubMed Central journal article supplement (PMC2661417)
Supplement: supp_283_42_28710__1.pdf [file supp_283_42_28710__1.pdf]

## Mark Nissen

---

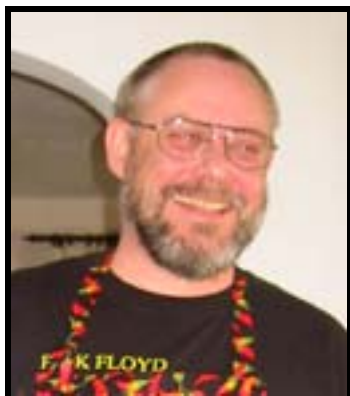

**Current Position:** Project Associate in the laboratory of Dr. ChulHee Kang at the Biomolecular X-ray Crystallography Center at Washington State University

**Education:** M.S. in Biochemistry and Biophysics (1984) from Washington State University

**Non-scientific Interests:** Whitewater rafting, telemark skiing, cooking

I have been at Washington State University since 1979. Over the years I have worked in several different laboratories at the University. In 2007 I was invited to join Dr. ChulHee Kang's group as a researcher and laboratory manager. Here I was introduced to EmoB, one of a number of proteins we study in collaboration with Dr. Luying Xun. These bacterial proteins are involved in the degradation of manmade environmental pollutants such as EDTA in the case of EmoB. We hope that a thorough understanding of the structures and catalytic mechanisms of the enzymes involved in these metabolic pathways will aid in understanding their physiological and environmental roles.

---

**Read Dr. Nissen's article entitled:** Crystal Structures of NADH:FMN Oxidoreductase (EmoB) at Different Stages of Catalysis

<http://www.jbc.org/cgi/content/full/283/42/28710>
